# Supplementary material
Source: Springer Nature journal article supplement (https://www.springermedizin.de/resource/supplementary/12913_2009_998_MOESM4_ESM.pdf/9536102)

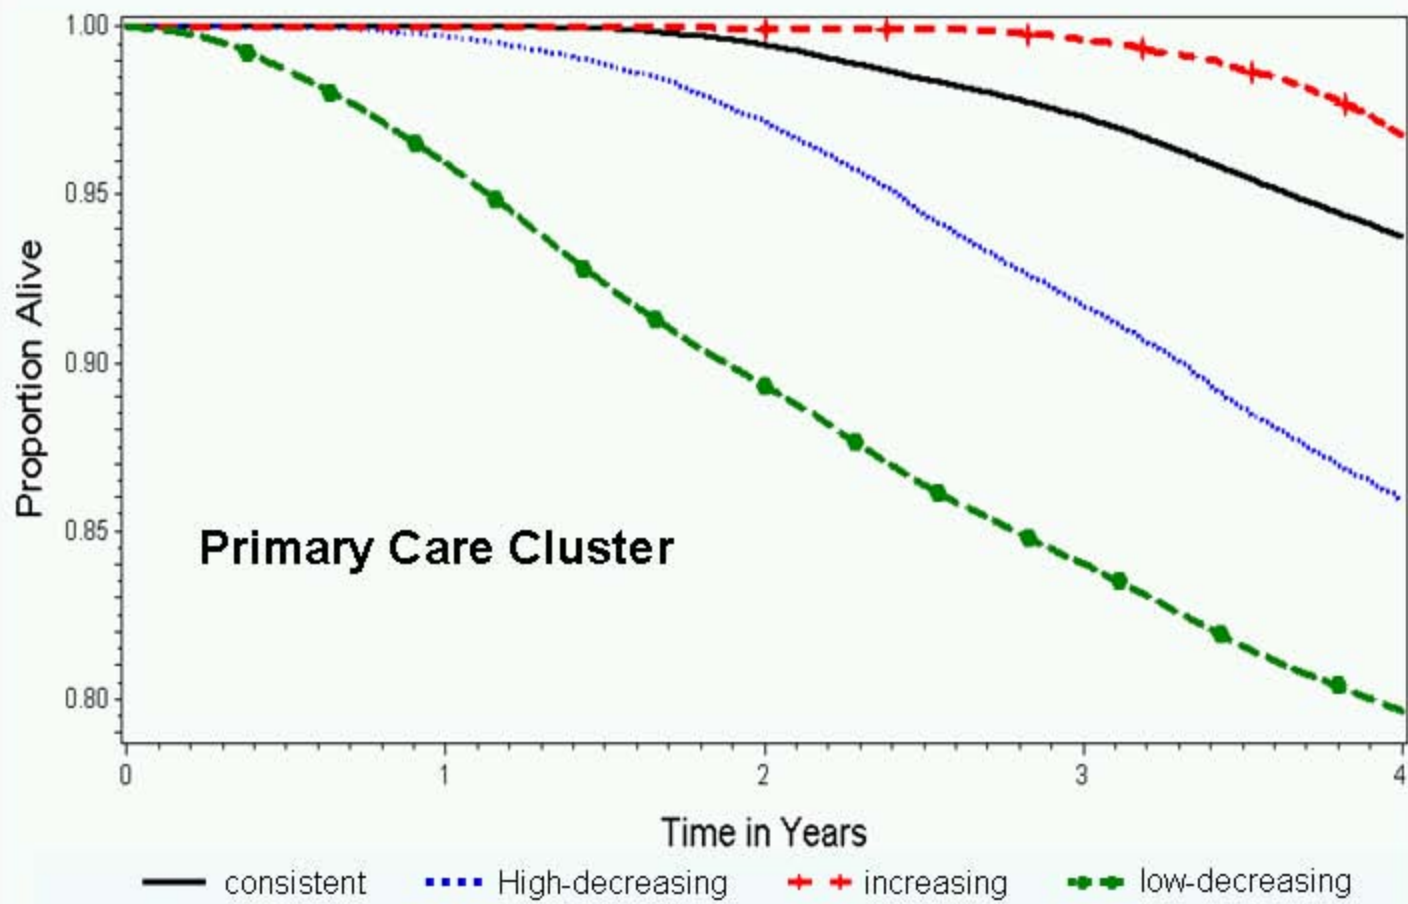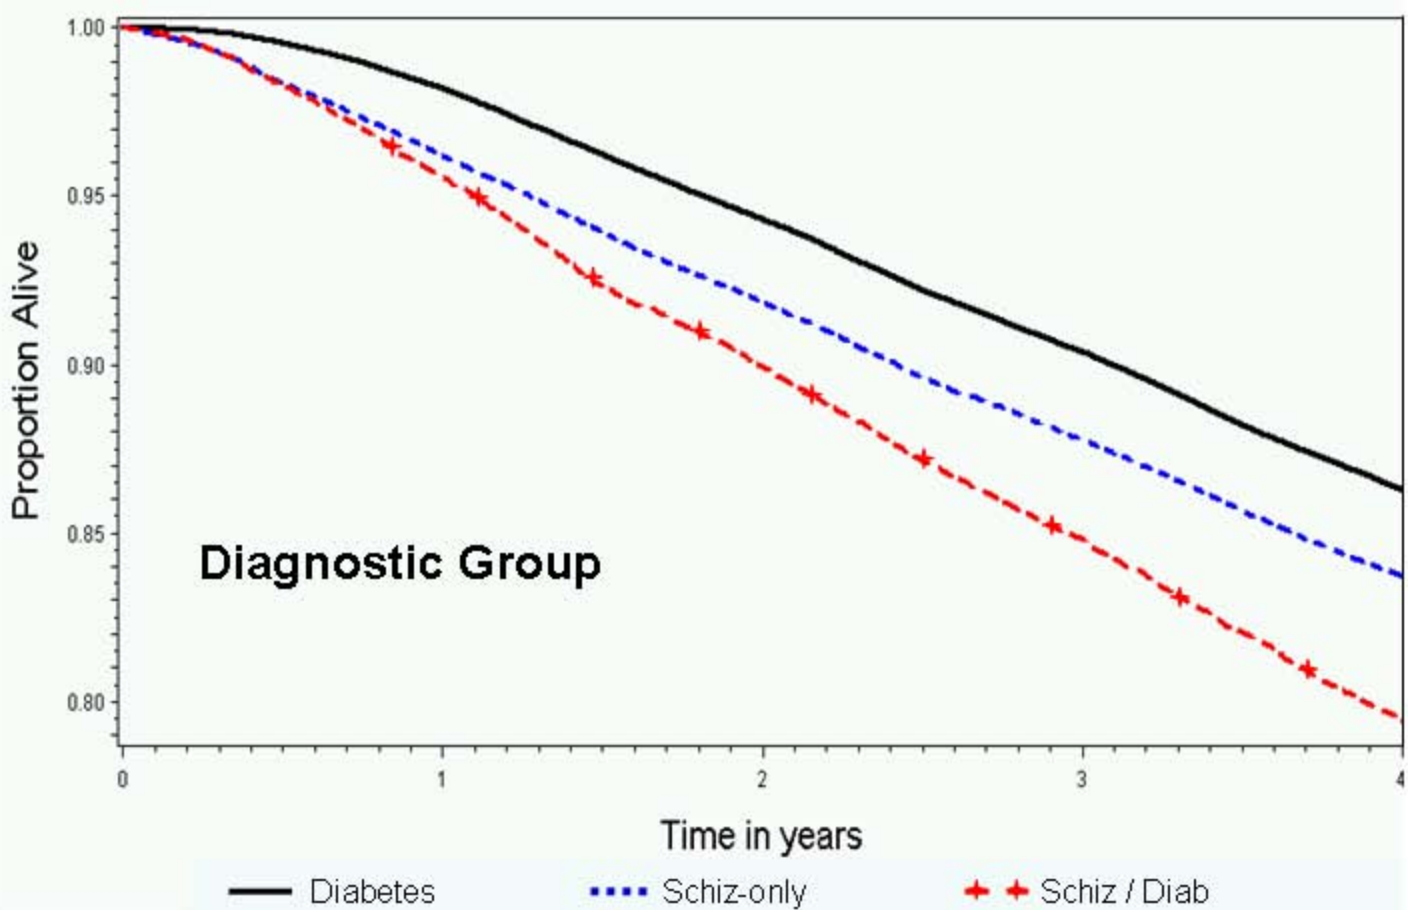

Supplement: MOESM4 [file 9536102]
